# Supplementary material for: One-step room temperature rapid synthesis of Cu2Se nanostructures, phase transformation, and formation of p-Cu2Se/p-Cu3Se2heterojunctions
Source: Royal Society of Chemistry journal article supplement (doi:10.1039/c6ce00370b), 2016-01-01
Supplement: c6ce00370b1.pdf [file c6ce00370b1.pdf]

## Supporting information:

### One-step room temperature rapid synthesis of $\text{Cu}_2\text{Se}$ nanostructures, phase transformation and formation of $\text{p-Cu}_2\text{Se/p-Cu}_3\text{Se}_2$ heterojunctions

Lianjie Zhu,<sup>a†</sup> Yanxing Zhao,<sup>a</sup> Wenjun Zheng,<sup>b†</sup> Ningning Ba,<sup>a</sup> Guangzhi Zhang,<sup>a</sup> Jing Zhang,<sup>b</sup> Xiaoting Li,<sup>c</sup> Hanjie Xie<sup>a</sup> and Lijian Bie<sup>c†</sup>

<sup>a</sup> School of Chemistry & Chemical Engineering, Tianjin Key Laboratory of Organic Solar Cells and Photochemical Conversion, Tianjin University of Technology, Tianjin 300384, PR China.

<sup>b</sup> Department of Materials Chemistry, Key Laboratory of Advanced Energy Materials Chemistry (MOE), College of Chemistry, Nankai University, Tianjin 300071, P. R. China.

<sup>c</sup> School of Materials Science and Engineering, Tianjin University of Technology, Tianjin 300384, PR China.

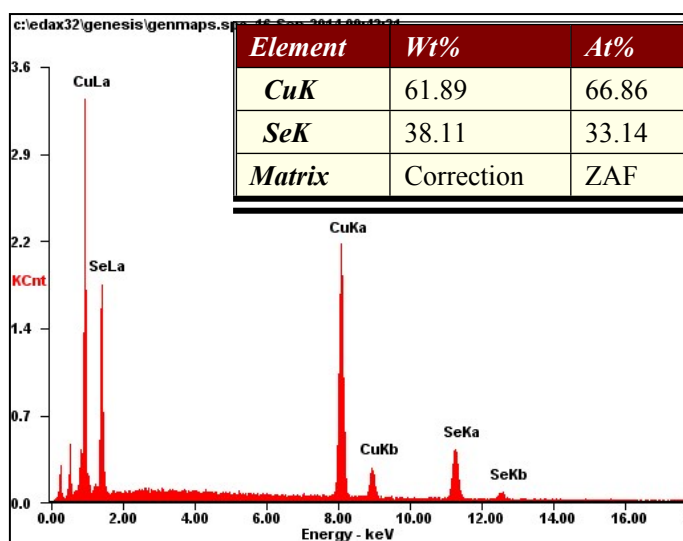

Fig. S1 EDX spectrum and element ratio of the as-prepared  $\text{Cu}_2\text{Se}$  powder.

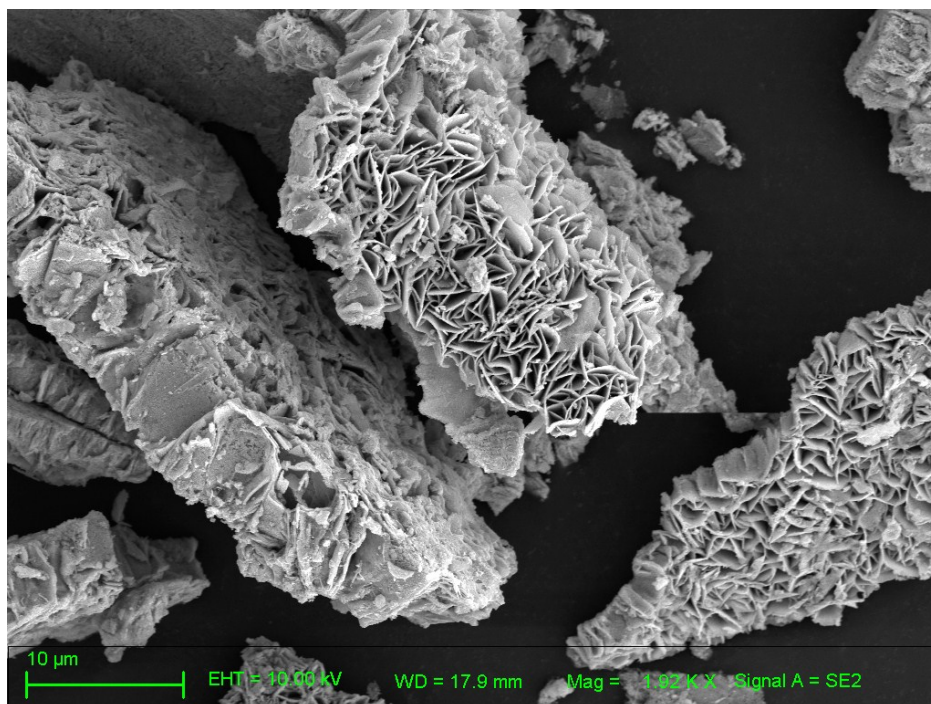

**Fig. S2** SEM image of the selected un-detached  $\text{Cu}_2\text{Se}$  powder after calcination at 300 °C for 3 h. The 3D flower-like microstructures on top of the nanosheet array were separated from the surface.

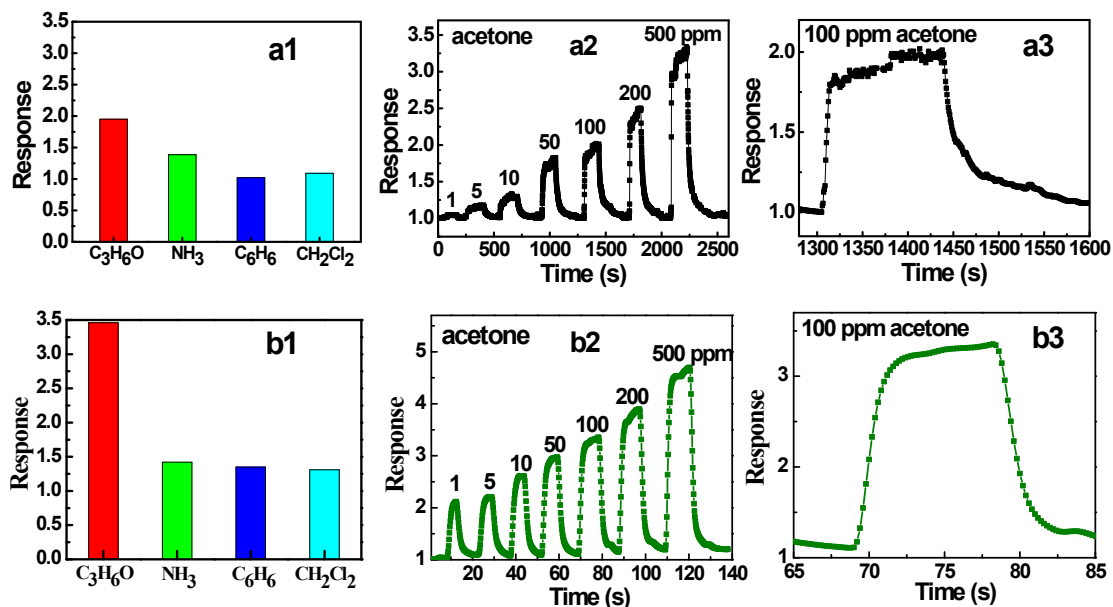

**Fig. S3** (a1,b1) Gas-sensing selectivity of the  $\text{Cu}_2\text{Se}$  sensor and  $\text{Cu}_2\text{Se}/\text{Cu}_3\text{Se}_2$  sensor, respectively, to various gases (100 ppm) at the operating temperature of 300 °C. (a2,b2) Dynamic response-recovery curves of the  $\text{Cu}_2\text{Se}$  sensor and  $\text{Cu}_2\text{Se}/\text{Cu}_3\text{Se}_2$  sensor, respectively, to acetone gas with various concentrations. (a3,b3) Transient responses of the  $\text{Cu}_2\text{Se}$  sensor and  $\text{Cu}_2\text{Se}/\text{Cu}_3\text{Se}_2$  sensor, respectively, to 100 ppm acetone gas.
